# Supplementary material for: A systematic review of substandard, falsified, unlicensed and unregistered medicine sampling studies: a focus on context, prevalence, and quality
Source: PubMed Central journal article supplement — BMJ Glob Health. 2020 Aug 27;5(8):e002393. doi: 10.1136/bmjgh-2020-002393 (PMC7454198; doi:10.1136/bmjgh-2020-002393), 2020-08-27
Supplement: bmjgh-2020-002393supp001.pdf [file bmjgh-2020-002393supp001.pdf]

# **A Systematic Review of Substandard, Falsified, Unlicensed and Unregistered Medicine Sampling Studies**

## **APPENDICES**

**Appendix, table 1: Strategy for literature search one (Substandard and falsified medicines)**

| No. | Search term(s)                      | Number of publications identified |         |         |
|-----|-------------------------------------|-----------------------------------|---------|---------|
|     |                                     | Embase                            | MEDLINE | PubMed  |
| 1   | Counterfeit                         | 1089                              | 471     | 643     |
| 2   | Fake                                | 823                               | 444     | 709     |
| 3   | Substandard                         | 1055                              | 513     | 708     |
| 4   | Falsified                           | 439                               | 200     | 294     |
| 5   | <b>1 or 2 or 3 or 4</b>             | 2975                              | 1419    | 2076    |
| 6   | Drug                                | 2897296                           | 531988  | 1227254 |
| 7   | Medicine                            | 3130772                           | 1614444 | 2031416 |
| 8   | Pharmaceutical                      | 293223                            | 158914  | 377926  |
| 9   | Antimicrobial                       | 91971                             | 55290   | 335249  |
| 10  | Antimalarial                        | 10761                             | 6930    | 16140   |
| 11  | Antibiotic                          | 209851                            | 48171   | 156407  |
| 12  | <b>6 or 7 or 8 or 9 or 10 or 11</b> | 5016630                           | 2047399 | 3013641 |
| 13  | <b>5 and 12</b>                     | 1943                              | 738     | 1035    |

**Appendix, table 2: Strategy for literature search two (Unlicensed and unregistered)**

| No. | Search term(s)                        | Number of publications identified |         |         |
|-----|---------------------------------------|-----------------------------------|---------|---------|
|     |                                       | Embase                            | MEDLINE | PubMed  |
| 1   | Counterfeit                           | 1089                              | 471     | 642     |
| 2   | Fake                                  | 823                               | 444     | 709     |
| 3   | Substandard                           | 1055                              | 513     | 709     |
| 4   | Falsified                             | 439                               | 200     | 294     |
| 5   | Unregistered                          | 339                               | 184     | 239     |
| 6   | Unlicensed                            | 925                               | 384     | 505     |
| 7   | <b>1 or 2 or 3 or 4 or 5 or 6</b>     | 4197                              | 1973    | 2798    |
| 8   | Drug                                  | 2897296                           | 531988  | 1224895 |
| 9   | Medicine                              | 3130772                           | 1614444 | 2030100 |
| 10  | Pharmaceutical                        | 293223                            | 158914  | 377583  |
| 11  | Antimicrobial                         | 91971                             | 55290   | 334384  |
| 12  | Antimalarial                          | 10761                             | 6930    | 16114   |
| 13  | Antibiotic                            | 209851                            | 48171   | 156079  |
| 14  | <b>8 or 9 or 10 or 11 or 12 or 13</b> | 5016630                           | 2047399 | 3011030 |
| 15  | <b>7 and 14</b>                       | 2846                              | 1065    | 1500    |

**Appendix, table 3: Data extraction of the 33 studies to pass quality assessment (Substandard and falsified)**

| Country [Reference]                                                                  | Drugs (n=number of various products tested)                                                                                                                                                                                                                                                                    | Setting                              | Formulation studied                    | Labeled origin                                                                                  | Method of testing/location                                                                                                                                                           | Stated problems                                                                                           | % (substandard or falsified)              | Methodological strength scoring (0-12) |
|--------------------------------------------------------------------------------------|----------------------------------------------------------------------------------------------------------------------------------------------------------------------------------------------------------------------------------------------------------------------------------------------------------------|--------------------------------------|----------------------------------------|-------------------------------------------------------------------------------------------------|--------------------------------------------------------------------------------------------------------------------------------------------------------------------------------------|-----------------------------------------------------------------------------------------------------------|-------------------------------------------|----------------------------------------|
| <b>The prevalence of falsified and substandard medicines in low-income countries</b> |                                                                                                                                                                                                                                                                                                                |                                      |                                        |                                                                                                 |                                                                                                                                                                                      |                                                                                                           |                                           |                                        |
| Malawi <sup>1</sup>                                                                  | Antibiotics and antimalarial drugs, artemether/lumefantrine, sulfadoxine/pyrimethamine, quinine hydrochloride, phenoxymethylpenicillin, amoxicillin, artesunate/amodiaquine, quinine sulphate, ciprofloxacin, amoxicillin/clavulanic acid, chloramphenicol, dihydroartemisinin/piperaquine, cefuroxime (n=155) | Public outlets                       | Tablets, capsules and injectables      | India, Kenya, China, USA, Malawi, Morocco, Tanzania, Cyprus, Austria, Switzerland, UAE, unknown | Thin-layer-chromatography, HPLC, disintegration testing / University of Malawi; Nairobi, Kenya                                                                                       | No active ingredient, inadequate active ingredient quantity, wrong active ingredient, dissolution failure | 1.5% (6/155 substandard, 1/155 falsified) | 10                                     |
| Malawi <sup>2</sup>                                                                  | Antimalarial drugs, Artemisinin and non-artemisinin based treatments (n=112)                                                                                                                                                                                                                                   | Public, private and informal outlets | Tablets                                | Local and imported                                                                              | Semi-quantitative TLC, HPLC / Department of Chemistry, University of Ghana, Legon, Accra, Ghana                                                                                      | Inadequate active ingredient quantity, excessive active ingredient quantity                               | 88.4% (substandard)                       | 10                                     |
| Tanzania <sup>3</sup>                                                                | Antimalarial drugs, artemisinin combination therapy, artemisinin, artesunate, artemether, dihydroartemisinin, dichlorodihydrate (n=1737)                                                                                                                                                                       | Private outlets                      | Tablets, oral suspensions, injectables | Local and imported                                                                              | HPLC, ultraviolet photo-diode array detection / Center for Disease Control Atlanta, GA; Georgia Institute of Technology, Atlanta, GA; London School of Hygiene and Tropical Medicine | Inadequate active ingredient quantity                                                                     | 12.1% (substandard)                       | 9                                      |

|                                                                                                                  |                                                                                                                                                          |                              |                                       |                                              |                                                                                                                                                                                      |                                                                                                  |                     |    |
|------------------------------------------------------------------------------------------------------------------|----------------------------------------------------------------------------------------------------------------------------------------------------------|------------------------------|---------------------------------------|----------------------------------------------|--------------------------------------------------------------------------------------------------------------------------------------------------------------------------------------|--------------------------------------------------------------------------------------------------|---------------------|----|
| Ethiopia <sup>4</sup>                                                                                            | Anthelmintic drugs (mebendazole, albendazole), antiprotozoal drugs (tinidazole) (n=106)                                                                  | Public and private outlets   | Tablets                               | China, Ethiopia, India, Kenya, Cyprus, Korea | HPLC, ultraviolet photo-diode array detection / Jimma University Laboratory of Drug Quality (JuLaDQ), Ethiopia                                                                       | Inadequate active ingredient quantity, excessive active ingredient quantity, dissolution failure | 45.3% (substandard) | 11 |
| Nepal <sup>5</sup>                                                                                               | Various; paracetamol, cloxacillin, amlodipine, metformin, losartan, cefixime, ofloxacin, carbamazepine (n=40)                                            | Public and private outlets   | Tablets and capsules                  | Local and imported                           | Comparison to control parameters: physical standard, identification, assay, disintegration, dissolution tests                                                                        | Inadequate active ingredient quantity, dissolution test failure                                  | 32.5% (substandard) | 6  |
| Afghanistan <sup>6</sup>                                                                                         | Antimalarial drugs (n=134)                                                                                                                               | Public and private outlets   | Tablets, syrups, injectable solutions | Local and imported                           | HPLC-UV-PDA / London School of Hygiene and Tropical Medicine                                                                                                                         | Disintegration, dissolution, content uniformity test failure.                                    | 26% (substandard)   | 10 |
| Togo <sup>7</sup>                                                                                                | Various, including antibiotics, antidiabetics, cardiac drugs and antiasthmatic drugs (n=92)                                                              | Private and informal outlets | Tablets                               | Africa, Asia and Europe                      | Visual inspection, HPLC, thermal degradation                                                                                                                                         | Inadequate/excessive active ingredient quantity                                                  | 11%                 | 10 |
| <b>The prevalence of falsified and substandard medicines in lower-middle-income countries in Asia and Africa</b> |                                                                                                                                                          |                              |                                       |                                              |                                                                                                                                                                                      |                                                                                                  |                     |    |
| Cambodia <sup>8</sup>                                                                                            | Antibiotics, (cefixime, clarithromycin), omeprazole, co-trimoxazole, sildenafil (n=325)                                                                  | Private outlets              | Tablets and capsules                  | Local and imported                           | HPLC, ultraviolet spectrophotometry, mass uniformity analysis, dissolution test / Shimadzu, Kyoto, Japan                                                                             | Inadequate active ingredient quantity, mass uniformity and dissolution failure                   | 43.7% (substandard) | 11 |
| Cambodia <sup>9</sup>                                                                                            | Antimalarial drugs, artesunate, artesunate + mefloquine, artemether, artemisinin/piperaquine, dihydroartemisinin/piperaquine, dihydroartemisinin (n=291) | Private outlets              | Tablets and injectables               | Local and imported                           | HPLC, ultraviolet photo-diode array detection / Center for Disease Control Atlanta, GA; Georgia Institute of Technology, Atlanta, GA; London School of Hygiene and Tropical Medicine | Inadequate active ingredient quantity                                                            | 31% (substandard)   | 10 |

|                        |                                                                                                      |                                      |                                                  |                                         |                                                                                                                                                                |                                                                                      |                                                           |    |
|------------------------|------------------------------------------------------------------------------------------------------|--------------------------------------|--------------------------------------------------|-----------------------------------------|----------------------------------------------------------------------------------------------------------------------------------------------------------------|--------------------------------------------------------------------------------------|-----------------------------------------------------------|----|
| Cambodia <sup>10</sup> | Antibiotics, amoxicillin-clavulanic acid (n=59)                                                      | Private outlets                      | Tablets                                          | Local and imported                      | HPLC, spectrophotometric testing / Department of Drug Management and Policy, Kanazawa University, Japan                                                        | Inadequate active ingredient quantity, content uniformity, dissolution test failures | 64.4% (substandard)                                       | 11 |
| Lao PDR <sup>11</sup>  | Antimalarial drugs, artesunate, chloroquine, quinine dihydrochloride, artemetherlumefantrine (n=146) | Private outlets                      | Tablets, injectables and syrups                  | Thailand, France, Vietnam, USA, unknown | HPLC, mass spectroscopy / Center for Disease Control Atlanta, GA; Georgia Institute of Technology, Atlanta, GA; London School of Hygiene and Tropical Medicine | Inadequate active ingredient quantity                                                | 25.4% (substandard)                                       | 9  |
| Nigeria <sup>12</sup>  | Antimalarial drugs, artemisinin combination therapy, artemisinin monotherapy (n=3024)                | Public, private and informal outlets | Tablets, capsules, oral suspensions, injectables | Local and imported                      | HPLC, mass spectroscopy, ultraviolet photo-diode array detection / London School of Hygiene and Tropical Medicine                                              | No active ingredient, inadequate active ingredient quantity                          | 9.3% (6.8% substandard, 1.3% degraded and 1.2% falsified) | 11 |
| Nigeria <sup>13</sup>  | Oxytocin, misoprostol, magnesium sulfate, calcium gluconate (n=637)                                  | Public outlets                       | Tablets, injectables                             | China, India, Germany                   | HPLC / not stated                                                                                                                                              | Inadequate active ingredient quantity                                                | 30% (substandard)                                         | 11 |
| Nigeria <sup>14</sup>  | Anti-hypertensive medicines - Amlodipine and Lisinonpril (n=440)                                     | Public outlets                       | Not stated                                       | Local and imported                      | HPLC / not stated                                                                                                                                              | Inadequate active ingredient quantity                                                | 32% (substandard)                                         | 6  |
| Kenya <sup>15</sup>    | Various; Antibiotics, antihistamines, NSAIDs (n=60)                                                  | Public and private outlets           | Tablets, capsules and rehydration salts          | Local and imported                      | HPLC, UV spectroscopy / Kenya National Quality Control Laboratory, Nairobi, Kenya                                                                              | Inadequate active ingredient quantity, dissolution test failure                      | 17% (substandard or falsified)                            | 9  |

|                     |                                                                                                                                                                       |                                      |                                             |                                     |                                                                                                                                                                     |                                       |                     |    |
|---------------------|-----------------------------------------------------------------------------------------------------------------------------------------------------------------------|--------------------------------------|---------------------------------------------|-------------------------------------|---------------------------------------------------------------------------------------------------------------------------------------------------------------------|---------------------------------------|---------------------|----|
| Kenya <sup>16</sup> | Antimalarial drugs, artemisinin combination therapy (n=39)                                                                                                            | Public and private outlets           | Tablets                                     | Local and imported                  | HPLC, UV spectroscopy / Drugs and Analysis Research unit, University of Nairobi, Nairobi, Kenya                                                                     | None                                  | 0% (substandard)    | 7  |
| Ghana <sup>17</sup> | Antimalarial drugs, artesunate, amodiaquine therapy (n=16)                                                                                                            | Private outlets                      | Tablets                                     | Local and imported                  | Qualitative colourmetric testing, HPLC, spectrophotometric testing / Department of Immunology, Noguchi Memorial Institute for Medical Research, Legon, Accra, Ghana | Inadequate active ingredient quantity | 6.3% (substandard)  | 11 |
| Ghana <sup>18</sup> | Antimalarial drugs, artemisinin combination therapy, artemisinin, artesunate, artemether, dihydroartemisinin, amodiaquine dichlorodihydrate and pyrimethamine (n=254) | Public, private and informal outlets | Tablets                                     | Local and imported                  | HPLC, mass spectroscopy, ultraviolet photodiode array detection / Georgia Institute of Technology, Atlanta, GA; London School of Hygiene and Tropical Medicine      | Inadequate active ingredient quantity | 35.4% (substandard) | 11 |
| Ghana <sup>19</sup> | Antibiotics, antimalarials, antihelmintics, antifungals, analgesics (n=68)                                                                                            | Public and private outlets           | Tablets and other formulations <sup>1</sup> | United Kingdom, South Africa, local | HPLC, ultraviolet spectrophotometry                                                                                                                                 | Inadequate active ingredient quantity | 62% (substandard)   | 9  |

|                                                                                                                  |                                                                                                                                                                             |                            |                                        |                                                                                                        |                                                                                                                                                                             |                                                            |                     |    |
|------------------------------------------------------------------------------------------------------------------|-----------------------------------------------------------------------------------------------------------------------------------------------------------------------------|----------------------------|----------------------------------------|--------------------------------------------------------------------------------------------------------|-----------------------------------------------------------------------------------------------------------------------------------------------------------------------------|------------------------------------------------------------|---------------------|----|
| Ghana and Nigeria <sup>20</sup>                                                                                  | Antibiotics, azithromycin, erythromycin, clindamycin (n=45)                                                                                                                 | Unknown                    | Tablets, capsules and oral suspensions | India, Ghana, England, Romania, Bangladesh, Italy, Nigeria, Ecuador, China, Malaysia, Pakistan, France | HPLC, ultraviolet spectrophotometry, dissolution test, US Pharmacopoeia requirements were used / Department of Chemistry and School of Pharmacy, University of Ghana, Legon | Inadequate active ingredient quantity                      | 73% (substandard)   | 8  |
| Mongolia <sup>21</sup>                                                                                           | Antibiotics and antimicrobials, (ampicillin, amoxicillin, co-trimoxazole, metronidazole, doxycycline, nystatin), analgesics (paracetamol and ibuprofen), bromhexin (n=1236) | Public and private outlets | Tablets and capsules                   | China, Mongolia, UK                                                                                    | Thin-layer-chromatography, ultraviolet spectrophotometry / School of Pharmacy, Mongolian National University of Medical Sciences, Ulaanbaatar, Mongolia                     | Inadequate active ingredient quantity, dissolution failure | 14.6% (substandard) | 11 |
| Myanmar <sup>22</sup>                                                                                            | Antimalarial drugs (n=153)                                                                                                                                                  | Public and private outlets | Tablets and capsules                   | Local and imported                                                                                     | HPLC, UV spectroscopy / College of Agronomy and Biotechnology, China Agricultural University, Beijing, China                                                                | No active ingredient present                               | 0.7% (falsified)    | 9  |
| <b>The prevalence of falsified and substandard medicines in upper-middle-income countries in Asia and Africa</b> |                                                                                                                                                                             |                            |                                        |                                                                                                        |                                                                                                                                                                             |                                                            |                     |    |



|                                                                                                                                                    |                                                                                                                                                                                                                                                                                                                                                              |                                      |                                             |                                                                                                                |                                                                                                                                                           |                                                                                         |                     |    |
|----------------------------------------------------------------------------------------------------------------------------------------------------|--------------------------------------------------------------------------------------------------------------------------------------------------------------------------------------------------------------------------------------------------------------------------------------------------------------------------------------------------------------|--------------------------------------|---------------------------------------------|----------------------------------------------------------------------------------------------------------------|-----------------------------------------------------------------------------------------------------------------------------------------------------------|-----------------------------------------------------------------------------------------|---------------------|----|
| Gabon <sup>23</sup>                                                                                                                                | Antimalarial drugs, artemether-lumefantrine, artesunate, amodiaquine, sulfadoxine, dihydroartemisinin-piperaquine, dihydroartemisinin-piperaquine-trimethoprim, artemisinin-piperaquine, artemisinin-naphtoquine, quinine, sulfadoxine-pyrimethamine, mefloquine, proguanil, atovaquone-proguanil, proguanil-chloroquine, pyrimethamine, chloroquine (n=432) | Public, private and informal outlets | Tablets                                     | India, China, Ivory Coast, Switzerland, Germany, Italy, Morocco, Greece, Luxembourg, Canada, UK, Spain, France | HPLC, thin-layer chromatography, ultraviolet photodiode array detection / London School of Hygiene and Tropical Medicine; Utrecht University, Netherlands | No active ingredient, inadequate active ingredient quantity                             | 0.5% (substandard)  | 11 |
| Kazakhstan <sup>24</sup>                                                                                                                           | Anti-tuberculosis drugs (n=854)                                                                                                                                                                                                                                                                                                                              | Public outlets                       | Various, including tablets and liquid forms | Kazakhstan, India, Russia                                                                                      | Dissolution test, semi-quantitative thin-layer chromatography / not stated                                                                                | Packaging test failure, Inadequate active ingredient quantity, dissolution test failure | 19% (substandard)   | 11 |
| South Africa <sup>25</sup>                                                                                                                         | Antibiotics (amoxicillin), Analgesics (paracetamol) (n=316 samples)                                                                                                                                                                                                                                                                                          | Public and private outlets           | Tablets                                     | Local and imported                                                                                             | Dissolution test, content uniformity test, HPLC, UV /                                                                                                     | Packaging test failure, inadequate active ingredient quantity, dissolution test failure | 55.4% substandard   | 12 |
| <b>The prevalence of falsified and substandard medicines in the mixed group</b>                                                                    |                                                                                                                                                                                                                                                                                                                                                              |                                      |                                             |                                                                                                                |                                                                                                                                                           |                                                                                         |                     |    |
| Benin, Burkina-Faso, Congo-Brazzaville, the Democratic Republic of Congo, Guinea, Côte d'Ivoire, Mauritania, Niger, Togo and Senegal <sup>26</sup> | Cardiovascular medications, anticoagulants (acenocoumarol), anti-hypertensives, furosemide, hydrochlorothiazide (diuretics), captopril (angiotensin-converting-enzyme inhibitor), atenolol (beta-blocker) and amlodipine (calcium channel blocker), Statins (simvastatin) (n=3468)                                                                           | Private and informal outlets         | Tablets and capsules                        | Europe, Asia, Africa, unknown                                                                                  | Reversed-phase liquid chromatography with tandem mass spectrometry / Department of Laboratories, Paris                                                    | Inadequate active ingredient quantity                                                   | 16.3% (substandard) | 12 |

|                                                                                                                                                                                                    |                                                    |                                      |                                        |                                                           |                                                                                                                                              |                                                                             |                               |   |
|----------------------------------------------------------------------------------------------------------------------------------------------------------------------------------------------------|----------------------------------------------------|--------------------------------------|----------------------------------------|-----------------------------------------------------------|----------------------------------------------------------------------------------------------------------------------------------------------|-----------------------------------------------------------------------------|-------------------------------|---|
| Angola, Brazil, China, Democratic Republic of Congo, Egypt, Ethiopia, Ghana, India, Kenya, Nigeria, Russia, Rwanda, Thailand, Turkey, Uganda, United Republic of Tanzania and Zambia <sup>27</sup> | Anti-tuberculosis drugs (n=713)                    | Public, private and informal outlets | Not stated                             | Not stated                                                | Thin-layer chromatography, HPLC, GPHF mini-lab/ Various locations                                                                            | Inadequate active ingredient quantity, dissolution test failure             | 9.1% (substandard)            | 8 |
| Ghana, Nigeria, United Kingdom <sup>28</sup>                                                                                                                                                       | Antibiotics, amoxicillin and co-trimoxazole (n=35) | Public, private and informal outlets | Tablets                                | China, Ghana, India, Ireland, Nigeria, and United Kingdom | Thin-layer chromatography, HPLC / London School of Hygiene and Tropical Medicine                                                             | Inadequate active ingredient quantity                                       | 26% (substandard)             | 8 |
| Kenya and Gabon <sup>29</sup>                                                                                                                                                                      | Anti-epileptic drugs (n=61)                        | Public, private and informal outlets | Not stated                             | Local and imported                                        | Active ingredients assay, related substances screening, mass uniformity, dissolution, disintegration and friability, MS and NMR / Not stated | Inadequate active ingredient quantity, No active ingredient present         | 5% (substandard or falsified) | 7 |
| Cambodia, Indonesia, Laos, Myanmar, Singapore, Thailand, and Vietnam <sup>30</sup>                                                                                                                 | Antimalarial drugs and antibiotics (n=188)         | Public, private and informal outlets | Various including tablets and capsules | Local and imported                                        | HPLC, Fourier transform infrared spectroscopy / Pharmaceutical laboratory Health Sciences Authority (HSA), Singapore                         | Inadequate active ingredient quantity, excessive active ingredient quantity | 31% (substandard)             | 8 |

|                                                                        |                                                |                                      |                                         |                                                                                                                                                                     |                                                                                                                   |                                                                                               |                                 |   |
|------------------------------------------------------------------------|------------------------------------------------|--------------------------------------|-----------------------------------------|---------------------------------------------------------------------------------------------------------------------------------------------------------------------|-------------------------------------------------------------------------------------------------------------------|-----------------------------------------------------------------------------------------------|---------------------------------|---|
| Cameroon, DR Congo, Nigeria, Kenya, Uganda, Ghana, India <sup>31</sup> | Various; predominantly anti-infectives (n=869) | Public, private and informal outlets | Tablets and capsules                    | India, China, Kenya, Ghana, Nigeria, Uganda, DR Congo, Cameroon, South Africa, UK, Germany, France, Netherlands, Cyprus, Italy, Spain, Switzerland, Belgium, Poland | TLC, HPLC, UV spectroscopy, GPHF Minilab / Department of drug administration, National medicine laboratory, Nepal | Inadequate active ingredient quantity, no active ingredient present, dissolution test failure | 2.4% (substandard or falsified) | 8 |
| Benin, DR Congo, Rwanda <sup>32</sup>                                  | Antimalarial drugs (n=34)                      | Private and informal outlets         | Tablets, capsules and rehydration salts | Local and imported                                                                                                                                                  | TLC, HPLC, Raman spectroscopy / not stated                                                                        | Insufficient API quantity, dissolution test failure, impurities present                       | 2.9% (substandard)              | 9 |
| Gabon, Kenya, Madagascar <sup>33</sup>                                 | Antiepileptic drugs (n=3782)                   | Public, private and informal outlets | Tablets and other formulations          | China, India, European union (unspec.), Senegal, local                                                                                                              | HPLC / not stated                                                                                                 | Insufficient API quantity                                                                     | 32.3% (substandard)             | 9 |

**Appendix figure 1: Geographical spread of countries in which prevalence studies on substandard and falsified medicines took place.**

**Appendix table 4: Data extraction of the 47 studies on the prevalence of Unlicensed and unregistered medicines**

| Country [Reference]                                                                     | Drugs (n=number of prescriptions/patients surveyed)                                                                                                                                                                                                                                                                                                                                                                               | Setting                                                  | Formulation studied                           | Labeled origin | Study type/location                                                                                                                                                                                                        | % (unlicensed or unregistered)                       |
|-----------------------------------------------------------------------------------------|-----------------------------------------------------------------------------------------------------------------------------------------------------------------------------------------------------------------------------------------------------------------------------------------------------------------------------------------------------------------------------------------------------------------------------------|----------------------------------------------------------|-----------------------------------------------|----------------|----------------------------------------------------------------------------------------------------------------------------------------------------------------------------------------------------------------------------|------------------------------------------------------|
| <b>The prevalence of unlicensed and unregistered medicines in high-income countries</b> |                                                                                                                                                                                                                                                                                                                                                                                                                                   |                                                          |                                               |                |                                                                                                                                                                                                                            |                                                      |
| Australia <sup>34</sup>                                                                 | Various therapeutic classes, including: alimentary tract and metabolism, cardiovascular system, dermatologicals, genito-urinary system and sex hormones, systemic hormonal preparations excl. sex hormones, anti-infectives, antineoplastics and immunomodulating agents, musculo-skeletal system, nervous system, anti-parasitic products, insecticides and repellent, respiratory system, sensory organs (n=2654 prescriptions) | Paediatric teaching hospital                             | Not stated                                    | Not stated     | 12 month retrospective study / Princess Margaret Hospital, Western Australia                                                                                                                                               | 2.6% of prescriptions were unlicensed                |
| Australia <sup>35</sup>                                                                 | Various drugs, including: salbutamol, ondansetron, ipratropium, fentanyl and oxycodone (n=6786 prescriptions)                                                                                                                                                                                                                                                                                                                     | Paediatric emergency departments of 6 teaching hospitals | Various, including tablets and oral solutions | Not stated     | 12 month retrospective observational study / Austin Hospital, Royal Childrens Hospital, Murdoch Childrens Research Institute, Monash Medical Centre, Dandenong Hospital, Sunshine Hospital; Melbourne, Victoria, Australia | 36.3% of prescriptions were unlicensed/off-label     |
| Canada <sup>36</sup>                                                                    | Various drugs, including: Morphine sulphate, Salbutamol, Polyethylene glycol, Lansoprazole, Diphenhydramine, Dimenhydrinate, Piercailline + tazobactam, Ondansetron, Metoclopramide, Hydrocortisone, Fentanyl, Ranitidine, Furosemide, Acetaminophen, Lorazepam, Hydromorphone, Pentamidine, Midazolam, Trimethoprim + sulfamethoxazol, Nystatin (n=2145 prescriptions)                                                           | Maternity-paediatric tertiary care hospital              | Various, including tablets and oral solutions | Not stated     | 24 hour, cross sectional study / Division of Emergency Medicine, Department of Pediatrics, CHU Sainte-Justine, Montreal, Quebec                                                                                            | 8.3% of prescriptions were unlicensed                |
| Canada <sup>37</sup>                                                                    | Intravenous Immunoglobulin (IVIG), indications included: secondary immunodeficiency, ITP, Kawasaki disease, primary immunodeficiency and Guillain-Barre Syndrome (n=54 patients)                                                                                                                                                                                                                                                  | Tertiary care pediatric centre                           | Not stated                                    | Not stated     | 6 month observational study / Children's Hospital of Eastern Ontario, Ottawa, Canada                                                                                                                                       | 56% of prescriptions were for unlicensed indications |

|                              |                                                                                                                                                                            |                                            |                                                       |            |                                                                                                                        |                                        |
|------------------------------|----------------------------------------------------------------------------------------------------------------------------------------------------------------------------|--------------------------------------------|-------------------------------------------------------|------------|------------------------------------------------------------------------------------------------------------------------|----------------------------------------|
| Spain <sup>38</sup>          | Various therapeutic classes, including: nervous system therapy, cardiovascular system and digestive system (n=696 prescriptions)                                           | Paediatric intensive care unit             | Not stated                                            | Not stated | 6 week observational, descriptive, prospective pilot study / Hospital Infantil Universitario Niño Jesús, Madrid, Spain | 8.9% of prescriptions were unlicensed  |
| Spain <sup>39</sup>          | Various drugs including: Ampicillin, gentamycin, midazolam, furosemide, dopamine, cefotaxime, metamizol, fentanyl, vancomycin and methylprednisolone (n=601 prescriptions) | Neonatal and pediatric intensive care unit | Various, including tablets and oral solutions         | Not stated | Prospective observational study / Hospital Axarquía, Velez Malaga, Spain                                               | 5% of prescriptions were unlicensed    |
| Spain <sup>40</sup>          | Various therapeutic classes, including: Anti-infectives, Nervous system, Alimentary tract and Metabolism, and others (n=273 prescriptions)                                 | Neonatal intensive care unit               | Various, including tablets and oral solutions         | Not stated | 3 months observational, retrospective study / La Arriaxacata Hospital, Spain                                           | 5% of prescriptions were unlicensed    |
| Italy <sup>41</sup>          | Cardiovascular drugs, central nervous system drugs, gastrointestinals and anti-infectives (n=720 prescriptions)                                                            | Neonatal intensive care units              | Various including injectables                         | Not stated | 1-day survey via an online questionnaire / all 107 level III Italian neonatal intensive care units.                    | 14.5% of prescriptions were unlicensed |
| Italy <sup>42</sup>          | Various therapeutic classes, including: Cardiovascular drugs, central nervous system drugs, gastrointestinals and anti-infectives (n=483 prescriptions)                    | Neonatal intensive care units              | Various including injectables                         | Not stated | 1 month observational study / Southern Italy                                                                           | 11.4% of prescriptions were unlicensed |
| Italy <sup>43</sup>          | Proton pump inhibitors (n=260 patients)                                                                                                                                    | Community pharmacies                       | Various, including tablets and oral solutions         | Not stated | 3 month cross sectional study / 8 community pharmacies across Italy                                                    | 48% of prescriptions were unlicensed   |
| Czech Republic <sup>44</sup> | Various therapeutic classes, including: ACE inhibitors, antihistamines, bronchodilators (n=8559 prescriptions)                                                             | Paediatric department, general hospital    | Various, including tablets and oral solutions         | Not stated | 6 month retrospective study / University Hospital Olomouc, Czech Republic                                              | 1.3% of prescriptions were unlicensed  |
| France <sup>45</sup>         | Various therapeutic classes, including: Alimentary tract, metabolic and nervous system (n=315 prescriptions)                                                               | Maternity-paediatric university hospital   | Various, including: tablets, capsules and injectables | Not stated | 1 day retrospective, cross-sectional study / Paris, France (hospital not stated)                                       | 3.2% of prescriptions were unlicensed  |
| France <sup>46</sup>         | Antibiotics (n=108 prescriptions)                                                                                                                                          | Maternity-paediatric university hospital   | Various, including: tablets, capsules and injectables | Not stated | Observational study / Lyon, France                                                                                     | 0% of prescriptions were unlicensed    |

|                           |                                                                                                                                                                                                                                                                                                                                                  |                                                                                    |                                                             |            |                                                                |                                                             |
|---------------------------|--------------------------------------------------------------------------------------------------------------------------------------------------------------------------------------------------------------------------------------------------------------------------------------------------------------------------------------------------|------------------------------------------------------------------------------------|-------------------------------------------------------------|------------|----------------------------------------------------------------|-------------------------------------------------------------|
| France <sup>47</sup>      | Anti-epileptic drugs (n=not stated)                                                                                                                                                                                                                                                                                                              | Paediatric tertiary referral centre                                                | Not stated                                                  | Not stated | Retrospective study / Necker Enfants Malades Hospital, France  | 26% of prescriptions were unlicensed                        |
| France <sup>48</sup>      | Various drugs, including: Tixocortol, tuaminoheptane, mequitazine, desloratadine, amoxicillin (n=1960 patients)                                                                                                                                                                                                                                  | Paediatric Outpatients, General Hospitals                                          | Various, including: tablets, capsules and injectables       | Not stated | 5 month observational study / Southwestern France              | 6.7% of prescriptions were unlicensed                       |
| France <sup>49</sup>      | Various therapeutics classes, including: Antibiotics, CNS drugs, Vitamins (n=8891 prescriptions)                                                                                                                                                                                                                                                 | Neonatal intensive care units of university hospitals                              | Not stated                                                  | Not stated | 12 month prospective study / France                            | 5.2% of prescriptions were unlicensed                       |
| Finland <sup>50</sup>     | Various drugs, including: Paracetamol, ibuprofen, fentanyl, salbutamol, midazolam, oxycodone, sevoflurane, caffeine, fluconazole (n=1054)                                                                                                                                                                                                        | Neonatal intensive care unit, general paediatric ward and paediatric surgical ward | Various, including: tablets, oral solutions and injectables | Not stated | 2 week prospective study / Kuopio University Hospital, Finland | 79% of patients received at least one unlicensed medication |
| Malta <sup>51</sup>       | Not stated (n=209 prescriptions)                                                                                                                                                                                                                                                                                                                 | Not stated                                                                         | Not stated                                                  | Not stated | Prospective longitudinal cohort study / Malta                  | 54.1% of prescriptions were unlicensed/off-label            |
| Malta <sup>52</sup>       | Various therapeutic classes, including: Alimentary tract and metabolism, blood and blood-forming organs, cardiovascular system, systemic hormonal preparations, anti-infectives for systemic use, antineoplastic and immunomodulating agents, musculo-skeletal system, nervous system, respiratory system, sensory organs (n=1507 prescriptions) | Paediatric, primary care                                                           | Not stated                                                  | Not stated | Prospective observational study / Malta                        | 3.3% of prescriptions were unlicensed                       |
| Netherlands <sup>53</sup> | Various drugs, including: Benzyl-penicillin, gentamycin, caffeine, morphine and surfactant (n=24903 prescriptions)                                                                                                                                                                                                                               | Neonatal intensive care unit                                                       | Not stated                                                  | Not stated | Retrospective study / Hospital not stated, Netherlands         | 8% of prescriptions were unlicensed                         |

|                                   |                                                                                                                                                                                                                                                                                                                                                 |                                       |                                                             |            |                                                                                                                      |                                        |
|-----------------------------------|-------------------------------------------------------------------------------------------------------------------------------------------------------------------------------------------------------------------------------------------------------------------------------------------------------------------------------------------------|---------------------------------------|-------------------------------------------------------------|------------|----------------------------------------------------------------------------------------------------------------------|----------------------------------------|
| Norway <sup>54</sup>              | Various therapeutic classes, including: Alimentary tract and metabolism, blood and blood-forming organs, cardiovascular system, systemic hormonal preparations, anti-infectives for systemic use, antineoplastic and immunomodulating agents, musculo-skeletal system, nervous system, respiratory system, sensory organs (n=930 prescriptions) | University hospital, paediatrics unit | Various, including: tablets, oral solutions and injectables | Not stated | 3 month prospective, cross-sectional study / Oslo University hospital, Ulleval, Akershus University hospital; Norway | 26% of prescriptions were unlicensed   |
| Norway <sup>55</sup>              | Not stated                                                                                                                                                                                                                                                                                                                                      | University hospital                   | Various, including: tablets, oral solutions and injectables | Not stated | 5 week retrospective study / Oslo University Hospital, Ulleval, Norway                                               | 32% of prescriptions were unlicensed   |
| Republic of Ireland <sup>56</sup> | Various drugs, including: Gentamycin, Vitmain K, Benzylpenicillin, Morphine Sulphate, Caffeine citrate, Phenylephrine, Cyclopentolate (n=69 drug types)                                                                                                                                                                                         | Neonatal intensive care unit          | Various, including: tablets, oral solutions and injectables | Not stated | 2 month prospective study / The National Maternity Hospital, Dublin, Ireland                                         | 19% of drugs were unlicensed           |
| United Kingdom <sup>57</sup>      | Various drugs, including: Metronidazole, Gentamicin, Spironolactone, Chloral hydrate, Diclofenac, Ondansetron, Dexanethsone, Ibuprofen, Melatonin, Folic acid, Morphine sulphate, Paracetamol, Salbutamol (n= 16551 courses)                                                                                                                    | Paediatric tertiary referral centre   | Various, including: tablets, oral solutions and injectables | Not stated | 12 month prospective observational study / Alder Hey Children's NHS Foundation Trust                                 | 5.4% of prescriptions were unlicensed  |
| United Kingdom <sup>58</sup>      | Various drugs, including: Cefuroxime, Cefotaxime, Chlorphenamine, Diazepam, Ibuprofen, Lactulose, Cefalexin, Metronidazole, Furosemide, Furosemide, Ondansetron, Salbutamol, Ranitidine, Dexamethasone, Fentanyl, Morphine, Diclofenac, Codeine Phosphate (n=10669 prescriptions)                                                               | Paediatric hospital                   | Various, including: tablets, oral solutions and injectables | Not stated | 12 month prospective observational study / Alder Hey Children's NHS Foundation Trust                                 | 7.5% of prescriptions were unlicensed  |
| United Kingdom <sup>59</sup>      | Antipsychotic drugs (n=50 patients)                                                                                                                                                                                                                                                                                                             | Community mental health patients      | Various, including: tablets, oral solutions and injectables | Not stated | 1 year study / Herefordshire, South England                                                                          | 17.5% of prescriptions were unlicensed |



|                                                                                                 |                                                                                                                                                                                                                                                                                                                                                                              |                                                  |                                                             |            |                                                                                                                                                                                    |                                                                   |
|-------------------------------------------------------------------------------------------------|------------------------------------------------------------------------------------------------------------------------------------------------------------------------------------------------------------------------------------------------------------------------------------------------------------------------------------------------------------------------------|--------------------------------------------------|-------------------------------------------------------------|------------|------------------------------------------------------------------------------------------------------------------------------------------------------------------------------------|-------------------------------------------------------------------|
| Slovak Republic <sup>60</sup>                                                                   | Various drugs, including: Cholecalciferol, Phytomenadione, Ketoconazole <sup>[1]</sup> , Gentamicin <sup>[1]</sup> , Anti-diarrheal microorganisms, Ampicillin, Pyridoxine, Folic acid, Clotrimazole, Phenobarbital (n=962 prescriptions)                                                                                                                                    | Paediatric hospital                              | Various, including: tablets, oral solutions and injectables | Not stated | 6 month cross sectional study / Pathological Newborns of Children's University Hospital, Bratislava, and Unit of Pathological Newborns of Teaching Hospital Nitra, Slovak Republic | 4.8% of prescriptions were unlicensed                             |
| <b>The prevalence of unlicensed and unregistered medicines in upper-middle-income countries</b> |                                                                                                                                                                                                                                                                                                                                                                              |                                                  |                                                             |            |                                                                                                                                                                                    |                                                                   |
| Lebanon <sup>61</sup>                                                                           | Various therapeutic classes including: Alimentary tract and metabolism, Blood and blood-forming organs, Cardiovascular system, Genitourinary system and sex hormones <sup>[1]</sup> , Anti-infective agents for systemic use, Antineoplastic and immune-modulating agents, Musculoskeletal system, Nervous system, Respiratory system, Sensory organs (n=2053 prescriptions) | Paediatric ICU, University hospital              | Various, including: tablets, oral solutions and injectables | Not stated | Retrospective analysis / Hôtel-Dieu de France Hospital, Saint-Joseph University of Beirut                                                                                          | 15.8% of prescriptions were unlicensed                            |
| Malaysia <sup>62</sup>                                                                          | Various drugsm including: Ferric ammonium citrate and folic acid (n=1295 prescriptions)                                                                                                                                                                                                                                                                                      | Paediatric and neonatal ICU, University hospital | Various, including: tablets, oral solutions and injectables | Not stated | 2 month prospective, observational exploratory study / Universiti Kebangsaan Malaysia Medical Centre, Malaysia                                                                     | 27.3% of prescriptions were unlicensed                            |
| Malaysia <sup>63</sup>                                                                          | Various therapeutic classes (n=888 medical products)                                                                                                                                                                                                                                                                                                                         | Multiple public outlets                          | Various                                                     | Not stated | 12 month cross sectional retrospective study / Malaysia                                                                                                                            | 0.45% of products were unregistered                               |
| Brazil <sup>64</sup>                                                                            | Antiepileptics, Phenobarbital, Phenytoin, Carbamazepine, Valproic acid, Clonazepam, Diazepam, Topiramate, Lorazepam, Clobazam, Vigabatrin, Lamotrigine, Oxcarbazepine, Nitrazepam, Levetiracetam, Divalproex, Gabapentin, Sulthiame (n=583 patients)                                                                                                                         | General hospital                                 | Tablets, injectables and oral solutions                     | Not stated | Cross-sectional, retrospective and observational study / General Hospital of the Faculty of Medicine at Ribeirao Preto, Brazil                                                     | 53.8% of patients prescribed a drug were given an unlicensed drug |
| Brazil <sup>65</sup>                                                                            | Various drugs, including: Acetaminophen and dipyron (n=1328 prescriptions)                                                                                                                                                                                                                                                                                                   | Paediatric nursery, general hospital             | Not stated                                                  | Not stated | Observational, transversal and retrospective study/ UFRGS-HCPA, Paediatrics service, Porto Alegre, Brazil                                                                          | 28% of prescriptions were unlicensed                              |

|                       |                                                                                                                                                                                                                                                                                                                                 |                                                              |                                                           |            |                                                                                                                                                  |                                                                  |
|-----------------------|---------------------------------------------------------------------------------------------------------------------------------------------------------------------------------------------------------------------------------------------------------------------------------------------------------------------------------|--------------------------------------------------------------|-----------------------------------------------------------|------------|--------------------------------------------------------------------------------------------------------------------------------------------------|------------------------------------------------------------------|
| Brazil <sup>66</sup>  | Various drugs, including: Metamizole, omeprazole, captopril, fenoterol, ranitidine, ceftriaxone (n=1158 prescriptions)                                                                                                                                                                                                          | Pediatric hospital                                           | Not stated                                                | Not stated | 6 month descriptive, prospective and cross-sectional study / Instituto de Saúde da Criança do Amazonas, Manaus, Amazonas. Brazil.                | 6.3% of prescriptions were unlicensed                            |
| Brazil <sup>67</sup>  | Various drugs, including: Aminophylline, Phytomenadione, Multivitamins, Folic acid, Ampicillin, Gentamicin, Fentanyl, Heparin, Pulmonary surfactant, Meropenem, Vancomycin, Dobutamine, Amphotericin B, Cefepime, Domperidone, Telcoplanin, Epinephrin, Triaculum Phosphate, Rainitidine, Femous Sulfate (n=3290 prescriptions) | Neonatal intensive care unit                                 | Various including injectables and oral solutions          | Not stated | 6 month retrospective study / Mother and Child Hospital of Brasilia, Brasilia, Brazil                                                            | 12% of prescriptions were unlicensed                             |
| Brazil <sup>68</sup>  | Various therapeutic classes, including: Alimentary tract and metabolism, immunosuppressants, antithrombotic agents, antivirals for systemic use, antiepileptics, lipid-modifying agents, antineoplastic agents (n=614 drug purchases)                                                                                           | Federal database                                             | Various including injectables and oral solutions          | Not stated | Longitudinal study / Brazilian Federal Government database, Brazil                                                                               | 0.1% of prescriptions were unlicensed                            |
| Brazil <sup>69</sup>  | Various therapeutic classes including: Alimentary tract and metabolism, immunosuppressants, antithrombotic agents, nervous system, anti-parasitics (n=3935 prescriptions)                                                                                                                                                       | Neonatal intensive care unit                                 | Various including injectables and oral solutions          | Not stated | Prospective cohort study / School Maternity Janua rio Cicco, Health Sciences Centre, Universidade Federal do Rio Grande Norte, Natal, RN, Brazil | 24.6% of prescriptions were unlicensed                           |
| Romania <sup>70</sup> | Various therapeutic classes, including: anti-infectives for systemic use, alimentary tract and metabolism, nervous system, and respiratory system (n=100 patients)                                                                                                                                                              | Paediatric unit, teaching hospital                           | Various including tablets, injectables and oral solutions | Not stated | Observational and retrospective study / paediatrics Clinic 3, Cluj-Napoca, Romania                                                               | 6.2% of patients prescribed a drug were given an unlicensed drug |
| Israel <sup>71</sup>  | Various therapeutic classes (n=1064 prescriptions, 49 medications)                                                                                                                                                                                                                                                              | Neonatal intensive care unit, paediatric intensive care unit | Various                                                   | Not stated | 2 month observational study / Assaf Harofeh Medical Center, Tel-Aviv, Israel                                                                     | 5.9% of prescriptions were unlicensed, 64.8 off-label            |

|                                                                                                 |                                                                                                                                                                                                       |                                    |                                                                  |                     |                                                                                                                                                                           |                                                         |
|-------------------------------------------------------------------------------------------------|-------------------------------------------------------------------------------------------------------------------------------------------------------------------------------------------------------|------------------------------------|------------------------------------------------------------------|---------------------|---------------------------------------------------------------------------------------------------------------------------------------------------------------------------|---------------------------------------------------------|
| Saudi Arabia <sup>72</sup>                                                                      | Various therapeutic classes (n=583 prescriptions)                                                                                                                                                     | Neonatal intensive care unit       | Various                                                          | Not stated          | 3 month prospective cohort study / King Fahd Medical Military Medical Complex, Dhahra                                                                                     | 12.9% of prescriptions were unlicensed, 29.7% off label |
| South Africa <sup>73</sup>                                                                      | Various drugs, including: HIV therapies (n=2402 prescriptions)                                                                                                                                        | Ambulatory clinics                 | Various including tablets, injectables and oral solutions        | Not stated          | 3 month prospective study / Tygerberg hospital, Cape Town, South Africa                                                                                                   | 2.7% of drugs prescriptions were unlicensed             |
| South Africa <sup>74</sup>                                                                      | Various drugs, including: Penicillin, Gentamycin, Aminophylline, Meropenem, Vancomycin, Phenobarbitone, Paracetamol, Lidocaine, Vitamin K, Glycerine suppository (n=759 medicines implicated in ADRs) | Neonatal intensive care unit       | Various including tablets, injectables and oral solutions        | Not stated          | 3 month prospective study / Tygerberg hospital, Cape Town, South Africa                                                                                                   | 12% of drugs prescriptions were unlicensed              |
| <b>The prevalence of unlicensed and unregistered medicines in lower-middle-income countries</b> |                                                                                                                                                                                                       |                                    |                                                                  |                     |                                                                                                                                                                           |                                                         |
| Mongolia <sup>21</sup>                                                                          | Antimicrobials, (ampicillin, amoxicillin, co-trimoxazole, metronidazole, doxycycline, nystatin), analgesics (paracetamol and ibuprofen), bromhexin (n=1236)                                           | Public and private outlets         | Tablets and capsules                                             | China, Mongolia, UK | Field study / 4 districts in Ulaanbaatar (Chingeltei, Khan-Uul, Bayanzurkh, and Songinokhair), 4 rural provinces (Bayan-Ugii, Dornogobi, Selenge, and Umnugobi), Mongolia | 17.7% of drugs collected were unregistered.             |
| India <sup>75</sup>                                                                             | Various drugs, including: Adrenaline, nor-adrenaline, Frusemide, Oseltamavir, Cefepime, Aminoven, Acetazolamide, Flucanazole, Nifedepine, Levetiracetam, Ceftriaxone, Clobazam (n=1790 prescriptions) | Paediatric intensive care units    | Various including tablets, capsules and intravenous formulations | Not stated          | 12 month prospective observational study / Department of Paediatrics, TN Medical College and BYL Nair Charitable Hospital, Mumbai, India                                  | 21% of prescriptions were unlicensed                    |
| India <sup>76</sup>                                                                             | Various therapeutic classes, including: antibiotics, pain relief, anti-infectives and anti-emetics. (n=405 prescriptions)                                                                             | Tertiary care teaching hospital    | Not stated                                                       | Not stated          | Prospective observational study / Hospital not stated                                                                                                                     | 0.2% of prescriptions were unlicensed                   |
| India <sup>77</sup>                                                                             | Neurological therapies, including: Oxcarbazepine, Sertraline, Lorazepam, Alprazolam, Topiramate, Risperidone (n=140 prescriptions)                                                                    | Tertiary care teaching hospital    | Various including tablets, capsules and intravenous formulations | Not stated          | 2 month prospective study / Hospital not stated                                                                                                                           | 3.6% of prescriptions were unlicensed                   |
| Indonesia <sup>78</sup>                                                                         | Various therapeutic classes, including: cardiovascular, antineoplastic and immunomodulating agents (n=1553 prescriptions)                                                                             | Paediatric unit, teaching hospital | Not stated                                                       | Not stated          | 12 month retrospective study / Cipto Mangunkusumo Hospital, Jakarta, Indonesia                                                                                            | 15.1% of prescriptions were unlicensed                  |

|                        |                                                                                                                                                                |                                                    |            |            |                                                                                                                                |                                        |
|------------------------|----------------------------------------------------------------------------------------------------------------------------------------------------------------|----------------------------------------------------|------------|------------|--------------------------------------------------------------------------------------------------------------------------------|----------------------------------------|
| Pakistan <sup>79</sup> | Various therapeutic classes, including: anti-infective agents for systemic use, musculoskeletal system, alimentary tract and metabolism (n=3168 prescriptions) | Paediatric surgical units, tertiary care hospitals | Not stated | Not stated | 12 month observational study / Lady Reading Hospital, Khyber Teaching Hospital, Northwest General Hospital; Peshawar, Pakistan | 64.9% of prescriptions were unlicensed |
|------------------------|----------------------------------------------------------------------------------------------------------------------------------------------------------------|----------------------------------------------------|------------|------------|--------------------------------------------------------------------------------------------------------------------------------|----------------------------------------|

**Appendix figure 2: Geographical spread of countries in which prevalence studies on unlicensed and unregistered medicines took place.**

## **Studies included in this review**

1. Khuluza F, Kigera S, Heide L. Low Prevalence of Substandard and Falsified Antimalarial and Antibiotic Medicines in Public and Faith-Based Health Facilities of Southern Malawi. *Am J Trop Med Hyg.* 2017 May;96(5):1124–35.
2. Chikowe I., Osei-Safo D., Harrison J.J.E.K., Konadu D.Y., Addae-Mensah I. Post-marketing surveillance of anti-malarial medicines used in Malawi. *Malar J.* 2015;14(1):127.
3. ACT Consortium Drug Quality Project Team and the IMPACT2 Study Team. Quality of Artemisinin-Containing Antimalarials in Tanzania's Private Sector--Results from a Nationally Representative Outlet Survey. *Am J Trop Med Hyg.* 2015;92(6 Suppl):75–86.
4. Suleman S, Zeleke G, Deti H, Mekonnen Z, Duchateau L, Levecke B, et al. Quality of medicines commonly used in the treatment of soil transmitted helminths and giardia in ethiopia: a nationwide survey. *PLoS Negl Trop Dis.* 2014 Dec;8(12):e3345.
5. Gyanwali P, Humagain BR, Aryal KK, Pandit A, Acharya T, Bista B, et al. Surveillance of Quality of Medicines Available in the Nepalese Market: A Study from Kathmandu Valley. *J Nepal Health Res Counc.* 2015;13(31):233–40.
6. Lalani M., Kaur H., Mohammed N., Mailk N., van Wyk A., Jan S., et al. Substandard antimalarials available in Afghanistan: a case for assessing the quality of drugs in resource poor settings. *Am J Trop Med Hyg.* 2015;92(6 Supplement):51–8.
7. Schafermann S., Wemakor E., Hauk C., Heide L. Quality of medicines in southern Togo: Investigation of antibiotics and of medicines for non-communicable diseases from pharmacies and informal vendors. *PLoS ONE.* 2018;13(11):e0207911.
8. Yoshida N, Khan MH, Tabata H, Dararath E, Sovannarith T, Kiet HB, et al. A cross-sectional investigation of the quality of selected medicines in Cambodia in 2010. *BMC Pharmacol Toxicol.* 2014;15(101590449):13.
9. Yeung S, Lawford HLS, Taberner P, Nguon C, van Wyk A, Malik N, et al. Quality of antimalarials at the epicenter of antimalarial drug resistance: results from an overt and mystery client survey in Cambodia. *Am J Trop Med Hyg.* 2015 Jun;92(6 Suppl):39–50.
10. Khan M.H., Hatanaka K., Sovannarith T., Nivanna N., Casas L.C.C., Yoshida N., et al. Effects of packaging and storage conditions on the quality of amoxicillin-clavulanic acid - an analysis of Cambodian samples. *BMC Pharmacol Toxicol.* 2013;14((Khan, Hatanaka, Casas, Yoshida, Tsuboi, Kimura) Drug Management and Policy, Kanazawa University, Kakuma-machi, Kanazawa, Ishikawa 920-1192, Japan):33.
11. Taberner P, Mayxay M, Culzoni MJ, Dwivedi P, Swamidoss I, Allan EL, et al. A Repeat Random Survey of the Prevalence of Falsified and Substandard Antimalarials in the Lao PDR: A Change for the Better. *Am J Trop Med Hyg.* 2015 Jun;92(6 Suppl):95–104.
12. Kaur H, Allan EL, Mamadu I, Hall Z, Ibe O, El Sherbiny M, et al. Quality of artemisinin-based combination formulations for malaria treatment: prevalence and risk factors for poor quality medicines in public facilities and private sector drug outlets in Enugu, Nigeria. *PloS One.* 2015;10(5):e0125577.
13. Anyakora C., Oni Y., Ezedinachi U., Adekoya A., Ali I., Nwachukwu C., et al. Quality medicines in maternal health: Results of oxytocin, misoprostol, magnesium sulfate and calcium gluconate quality audits. *BMC Pregnancy Childbirth.*

- 2018;18(1):44.
14. Redfern J., Adedoyin R.A., Ofori S., Anchala R., Vamadevan A.S., De Andrade L., et al. Equivalence In Active Pharmaceutical Ingredient of Generic Antihypertensive Medicines Available In Three Nigerian States (EQUIMEDS): A Case For Further Surveillance. *Glob Heart*. 2018;13(4):381.
  15. Wafula F, Dolinger A, Daniels B, Mwaura N, Bedoya G, Rogo K, et al. Examining the Quality of Medicines at Kenyan Healthcare Facilities: A Validation of an Alternative Post-Market Surveillance Model That Uses Standardized Patients. *Drugs - Real World Outcomes*. 2017 Mar;4(1):53–63.
  16. Ndwigah S, Stergachis A, Abuga K, Mugo H, Kibwage I. The quality of anti-malarial medicines in Embu County, Kenya. *Malar J*. 2018 Sep 15;17(1):330.
  17. Affum A.O., Lowor S., Osa S.D., Dickson A., Gyan B.A., Tulasi D. A pilot study on quality of artesunate and amodiaquine tablets used in the fishing community of Tema, Ghana. *Malar J*. 2013;12(1):220.
  18. Tivura M, Asante I, van Wyk A, Gyaase S, Malik N, Mahama E, et al. Quality of Artemisinin-based Combination Therapy for malaria found in Ghanaian markets and public health implications of their use. *BMC Pharmacol Toxicol*. 2016 Oct 28;17(1):48.
  19. Frimpong G., Ofori-Kwakye K., Kuntworbe N., Buabeng K.O., Osei Y.A., El Boakye-Gyasi M., et al. Quality Assessment of Some Essential Children's Medicines Sold in Licensed Outlets in Ashanti Region, Ghana. *J Trop Med*. 2018;2018((Frimpong, Ofori-Kwakye, Kuntworbe, Osei, El Boakye-Gyasi) Department of Pharmaceutics, Faculty of Pharmacy and Pharmaceutical Sciences, College of Health Sciences, Kwame Nkrumah University of Science and Technology, Kumasi, Ghana):1494957.
  20. Osei-Safo D., Egbo H.A., Nettey H., Konadu D.Y., Addae-Mensah I. Evaluation of the quality of some antibiotics distributed in Accra and Lagos [Internet]. *International Journal of Pharmaceutical Sciences and Research*. 2016. Available from: [http://ijpsr.com/?action=download\\_pdf&postid=25126](http://ijpsr.com/?action=download_pdf&postid=25126)
  21. Khurelbat D, Dorj G, Bayarsaikhan E, Chimedsuren M, Sanjjav T, Morimoto T, et al. Prevalence estimates of substandard drugs in Mongolia using a random sample survey. *SpringerPlus*. 2014;3:709.
  22. Guo S, Kyaw MP, He L, Min M, Ning X, Zhang W, et al. Quality Testing of Artemisinin-Based Antimalarial Drugs in Myanmar. *Am J Trop Med Hyg*. 2017 Jul 31;
  23. Visser BJ, Meerveld-Gerrits J, Kroon D, Mougoula J, Vingerling R, Bache E, et al. Assessing the quality of anti-malarial drugs from Gabonese pharmacies using the MiniLab: a field study. *Malar J*. 2015;14(101139802):273.
  24. Nabirova D., Schmid G., Yusupova R., Kantarbayeva M., Ismailov S.I., Moffett D., et al. Assessment of the quality of anti-tuberculosis medicines in Almaty, Kazakhstan, 2014. *Int J Tuberc Lung Dis*. 2017;21(10):1161–8.
  25. Lehmann A., Katerere D.R., Dressman J. Drug Quality in South Africa: A Field Test. *J Pharm Sci* [Internet]. 2018;((Lehmann, Dressman) Goethe University Frankfurt am Main, Institute of Pharmaceutical Technology, Frankfurt, Germany). Available from: <http://www.interscience.wiley.com/jpages/0022-3549>
  26. Antignac M, Diop BI, Macquart de Terline D, Bernard M, Do B, Ikama SM, et al. Fighting fake medicines: First quality evaluation of cardiac drugs in Africa. *Int J Cardiol*. 2017 Jun 19;
  27. Bate R., Jensen P., Hess K., Mooney L., Milligan J. Substandard and falsified anti-tuberculosis drugs: A preliminary field analysis. *Int J Tuberc Lung Dis*.

- 2013;17(3):308–11.
28. Fadeyi I., Lalani M., Mailk N., Van Wyk A., Kaur H. Quality of the antibiotics--amoxicillin and co-trimoxazole from Ghana, Nigeria, and the United Kingdom. *Am J Trop Med Hyg.* 2015;92(6 Supplement):87–94.
  29. Jost J., Sivadier G., Ba A., Ngoungou E., Kariuki S., Ratsimbazafy V., et al. Quality of antiepileptic drugs in Africa: Results from a pilot study (Quaeda) in Kenya and Gabon. *J Neurol Sci.* 2015;357((Jost, Ratsimbazafy, Preux) INSERM U1094 Tropical Neuroepidemiology, Univ. Limoges, Institute of Neuroepidemiology and Tropical Neurology, Limoges, France):e28–9.
  30. Yong Y.L., Plancon A., Lau Y.H., Hostetler D.M., Fernandez F.M., Green M.D., et al. Collaborative health and enforcement operations on the quality of antimalarials and antibiotics in southeast Asia. *Am J Trop Med Hyg.* 2015;92(6 Supplement):105–12.
  31. Petersen A., Held N., Heide L. Surveillance for falsified and substandard medicines in Africa and Asia by local organizations using the low-cost GPHF Minilab. *PLoS ONE.* 2017;12(9):e0184165.
  32. Yemoa A, Habyalimana V, Mbinze JK, Crickboom V, Muhigirwa B, Ngoya A, et al. Detection of poor quality artemisinin-based combination therapy (ACT) medicines marketed in Benin using simple and advanced analytical techniques. *Curr Drug Saf.* 2017 Jun 15;
  33. Jost J., Ratsimbazafy V., Nguyen T.T., Nguyen T.L., Dufat H., Dugay A., et al. Quality of antiepileptic drugs in sub-Saharan Africa: A study in Gabon, Kenya, and Madagascar. *Epilepsia.* 2018;59(7):1351–61.
  34. Czarniak P, Bint L, Favie L, Parsons R, Hughes J, Sunderland B. Clinical setting influences off-label and unlicensed prescribing in a paediatric teaching hospital. *PloS One.* 2015;10(3):e0120630.
  35. McD Taylor D., Joffe P., Taylor S.E., Jones A., Cheek J.A., Craig S.S., et al. Off-label and unlicensed medicine administration to paediatric emergency department patients [Internet]. *EMA - Emergency Medicine Australasia.* 2015. Available from: <http://www.blackwellpublishing.com/ema>
  36. Corny J., Bailey B., Lebel D., Bussieres J.-F. Unlicensed and off-label drug use in paediatrics in a mother-child tertiary care hospital. *Paediatr Child Health Can.* 2016;21(2):83–7.
  37. Leung E., Labelle R. IVIG utilization in a tertiary care pediatric centre: Evidence-based clinical ordering practices account for the majority of IVIG use. *Pediatr Blood Cancer.* 2013;60((Leung, Labelle) Children's Hospital of Eastern Ontario, Ottawa, Canada):S18.
  38. Garcia-Lopez I, Fuentes-Rios JE, Manrique-Rodriguez S, M Fernandez-Llamazares C. [Off-label and unlicensed drug use: Results from a pilot study in a pediatric intensive care unit]. *An Pediatr Barc Spain* 2003. 2017 Jan;86(1):28–36.
  39. Blanco-Reina E, Medina-Claros AF, Vega-Jimenez MA, Ocana-Riola R, Marquez-Romero EI, Ruiz-Extremera A. Drug utilization pattern in children and off-label use of medicines in a pediatric intensive care unit. *Med Intensiva.* 2016;40(1):1–8.
  40. Casan V.A., Escribano B.C., Garrido-Corro B., De La Cruz Murie P., Alvarez M.J.B., De La Rubia Nieto M.A. Off-label and unlicensed drug use in a Spanish Neonatal Intensive Care Unit. *Farm Hosp.* 2017;41(3):371–81.
  41. Cuzzolin L., Agostino R. Off-label and unlicensed drug treatments in Neonatal Intensive Care Units: An Italian multicentre study [Internet]. *European Journal of Clinical Pharmacology.* 2016. Available from: <http://link.springer.de/link/service/journals/00228/index.htm>



42. Laforgia N, Nuccio MM, Schettini F, Dell’Aera M, Gasbarro AR, Dell’Erba A, et al. Off-label and unlicensed drug use among neonatal intensive care units in Southern Italy. *Pediatr Int Off J Jpn Pediatr Soc.* 2014;56(1):57–9.
43. Pasina L, Urru SAM, Mandelli S, Giua C, Minghetti P, SGCP Investigators. Evidence-based and unlicensed indications for proton pump inhibitors and patients’ preferences for discontinuation: a pilot study in a sample of Italian community pharmacies. Pelliccia C SE Gamaleri F, Greco ML, Antuofermo M, Papes S, Marotto S, Ganduscio G, Zacchia M, editor. *J Clin Pharm Ther.* 2016;41(2):220–3.
44. Langerova P, Vrtal J, Urbanek K. Incidence of unlicensed and off-label prescription in children. *Ital J Pediatr.* 2014 Feb 4;40:12.
45. Joret-Descout P, Prot-Labarthe S, Brion F, Bataille J, Hartmann J-F, Bourdon O. Off-label and unlicensed utilisation of medicines in a French paediatric hospital. *Int J Clin Pharm.* 2015 Dec;37(6):1222–7.
46. Berthod C., Kassai B., Boussageon R., Adelaide L., Jacquet-lagreze M., Lajoinie A. Therapie [Internet]. 2017;((Berthod, Kassai, Lajoinie) Centre d’investigation clinique pediatrique CIC 1407 Inserm-UMR 5558 CNRS Lyon, universite et hospices civils de Lyon, 69003 Lyon, France). Available from: <http://www.journal-therapie.org/>
47. Chemaly N., Henniene M.B., Kuchenbuch M., Nabbout R. Off label and unlicensed use of AEDs in pediatric population: A retrospective study. *Eur J Paediatr Neurol.* 2015;19((Chemaly, Henniene, Kuchenbuch, Nabbout) Centre de Reference des Epilepsies rares, Neuropediatric Department, Necker Enfants Malades Hospital, Paris, France):S109–10.
48. Palmaro A., Bissuel R., Renaud N., Durrieu G., Escourrou B., Oustric S., et al. Off-label prescribing in pediatric outpatients. *Pediatrics.* 2015;135(1):49–58.
49. Riou S., Plaisant F., Giraud C., Maucort Boulch D., Kassai B., Claris O., et al. Unlicensed and off-label drug used: A prospective study in French neonatal intensive care units. *Fundam Clin Pharmacol.* 2014;28((Riou, Plaisant, Claris) HCL/UCBL/HFME-service de Neonatologie et Reanimation neonatale, Lyon, France):23.
50. Lindell-Osuagwu L, Hakkarainen M, Sepponen K, Vainio K, Naaranlahti T, Kokki H. Prescribing for off-label use and unauthorized medicines in three paediatric wards in Finland, the status before and after the European Union Paediatric Regulation. *J Clin Pharm Ther.* 2014 Apr;39(2):144–53.
51. Ellul IC, Grech V. Off-label and unlicensed paediatric prescribing in a community setting: a prospective longitudinal cohort study in Malta. *Paediatr Int Child Health.* 2014;34(1):12–8.
52. Ellul I, Grech V, Attard-Montalto S. Paediatric off-label and unlicensed prescribing in primary care in Malta: Prospective observational drug utilisation study. *Int J Risk Saf Med.* 2015;27(3):123–34.
53. Flint R.B., Simons S.H.P., Burger D.M., De Groot R., Reiss I.K.M., Tibboel D. Analyses of current unlicensed and off-label for age drug prescriptions at a neonatal intensive care unit. *Arch Dis Child.* 2014;99((Flint, Simons) Neonatology, Erasmus University Medical Center, Sophia Children’s Hospital, Rotterdam, Netherlands):A63.
54. Teigen A, Wang S, Truong BT, Bjercknes K. Off-label and unlicensed medicines to hospitalised children in Norway. *J Pharm Pharmacol.* 2017 Apr;69(4):432–8.
55. Teigen A., Wang S., Bergan S., Bjercknes K. Off-label use of medicines in hospitalised children and adolescents in two wards in Norway. *Int J Clin Pharm.* 2015;37(1):234–5.
56. Kieran EA, O’Callaghan N, O’Donnell CPF. Unlicensed and off-label drug use in an

- Irish neonatal intensive care unit: a prospective cohort study. *Acta Paediatr Oslo Nor* 1992. 2014;103(4):e139-42.
57. Bellis JR, Kirkham JJ, Nunn AJ, Pirmohamed M. Adverse drug reactions and off-label and unlicensed medicines in children: a prospective cohort study of unplanned admissions to a paediatric hospital. *Br J Clin Pharmacol*. 2014;77(3):545–53.
  58. Bellis JR, Kirkham JJ, Thiesen S, Conroy EJ, Bracken LE, Mannix HL, et al. Adverse drug reactions and off-label and unlicensed medicines in children: a nested case-control study of inpatients in a pediatric hospital. *BMC Med*. 2013 Nov 7;11:238.
  59. Seshadri M., Elsemary A., Thalitaya M.D., Chikodzore L., Nagalingam P. Study on the prescribing patterns of antipsychotic medication in a Rural England community mental health team. *Psychiatr Danub*. 2017;29(Supplement 3):S524–9.
  60. Schweigertova J, Durisova A, Dolnikova D, Ondriasova E, Balazova M, Slezakova V, et al. Off-label and unlicensed use of medicinal products in the neonatal setting in the Slovak Republic. *Pediatr Int Off J Jpn Pediatr Soc*. 2016;58(2):126–31.
  61. Berdkan S, Rabbaa L, Hajj A, Eid B, Khabbaz L, et al. Comparative Assessment of Off-label and Unlicensed Drug Prescriptions in Children: FDA Versus ANSM Guidelines. *Clin Ther*. 2016;38(8):1833–44.
  62. Lee JL, Redzuan AM, Shah NM. Unlicensed and off-label use of medicines in children admitted to the intensive care units of a hospital in Malaysia. *Int J Clin Pharm*. 2013;35(6):1025–9.
  63. Ting C.Y., Loo S.C., Sim S.T., Tee E.C., Hassali M.A., Abd Jabar A.H.A., et al. Unregistered Medical Products Detected by Malaysia's Pharmacy Enforcement Division During Routine Inspection: A Cross-Sectional Study among Selected Mainstream Medicines' Retailers in the State of Sarawak. *Pharm Med*. 2018;32(2):143–8.
  64. Borges AP de S, Campos MS de A, Pereira LRL. Evaluation of unlicensed and off-label antiepileptic drugs prescribed to children: Brazilian Regulatory Agency versus FDA. *Int J Clin Pharm*. 2013 Jun;35(3):425–31.
  65. Dornelles A.D., Calegari L.H., Souza L., Ebone P., Tonelli T.S., Carvalho C.G. Off label and unlicensed use in general pediatric hospital. *European Journal of Pediatrics*. 2016.
  66. Gomes V.P., Da Silva K.M., Chagas S.O., Magalhaes I.R.D.S. Off-label and unlicensed utilization of drugs in a Brazilian pediatric hospital [Internet]. *Farmacia Hospitalaria*. 2015. Available from: [http://www.sefh.es/fh/147\\_8472.pdf](http://www.sefh.es/fh/147_8472.pdf)
  67. de Souza ASJ, Dos Santos DB, Rey LC, Medeiros MG, Vieira MG, Coelho HLL. Off-label use and harmful potential of drugs in a NICU in Brazil: A descriptive study. *BMC Pediatr*. 2016;16(100967804):13.
  68. Teodoro C.R.S., Caetano R., Godman B., dos Reis A.L.A., de Araujo Maia A., de Carvalho Barbosa Ramos M., et al. Federal procurement of unlicensed medicines in Brazil; findings and implications. *Expert Rev Pharmacoecon Outcomes Res*. 2017;((Teodoro, Osorio-de-Castro) Department of Pharmaceutical Policies and Pharmaceutical Services, Sergio Arouca National School of Public Health, Oswaldo Cruz Foundation, Rio de Janeiro, Brazil):1–7.
  69. De Lima Costa H.T.M., Costa T.X., Martins R.R., Oliveira A.G. Use of off-label and unlicensed medicines in neonatal intensive care. *PLoS ONE*. 2018;13(9):e0204427.
  70. Man S.C., Primejdie D.P., Sarkozi I.-K., Popa A. Off-label and unlicensed prescribing in hospitalized children: Prevalence and reasons [Internet]. *Farmacia*. 2017. Available from: [http://www.revistafarmacia.ro/201703/art-23-Vostinaru\\_Balica\\_Crisan\\_467-471.pdf](http://www.revistafarmacia.ro/201703/art-23-Vostinaru_Balica_Crisan_467-471.pdf)
  71. Nir-Neuman H., Abu-Kishk I., Toledano M., Heyman E., Ziv-Baran T., Berkovitch

- M. Unlicensed and Off-Label Medication Use in Pediatric and Neonatal Intensive Care Units: No Change Over a Decade. *Adv Ther.* 2018;35(7):1122–32.
72. Mazhar F., Akram S., Haider N., Hadi M.A., Sultana J. Off-label and unlicensed drug use in hospitalized newborns in a Saudi tertiary care hospital: a cohort study. *Int J Clin Pharm.* 2018;40(3):700–3.
73. Kooblal Y., Kruger M. Unlicensed and off label drug use in children an a large central hospital in South Africa. *Basic Clin Pharmacol Toxicol.* 2014;115:337.
74. Thomas A., Kruger M. The use of unlicensed and off label drugs in tygerberg hospital neonatal intensive care unit. *Basic Clin Pharmacol Toxicol.* 2014;115:337.
75. Jobanputra N, Save SU, Bavdekar SB. Off-label and unlicensed drug use in children admitted to Pediatric Intensive Care Units (PICU). *Int J Risk Saf Med.* 2015;27(3):113–21.
76. Bhadiyadara S.N., Rana D.A., Malhotra S.D., Patel V.J. Off-label and unlicensed drug use in paediatric outpatient department - A prospective study at a tertiary care teaching hospital [Internet]. *Journal of Young Pharmacists.* 2015. Available from: [http://www.jyoungpharm.org/sites/default/files/JYP\\_7\\_3\\_5.pdf](http://www.jyoungpharm.org/sites/default/files/JYP_7_3_5.pdf)
77. Bhatt K.M., Malhotra S.D., Patel K.P., Patel V.J. Drug utilization in pediatric neurology outpatient department: A prospective study at a tertiary care teaching hospital. *J Basic Clin Pharm.* 2014;5(3):68–73.
78. Ramadaniati H.U., Tambunan T., Khairani S., Adisty H.S. Off-label and unlicensed prescribing in pediatric inpatients with nephrotic syndrome in a major teaching hospital: An Indonesian context [Internet]. *Asian Journal of Pharmaceutical and Clinical Research.* 2017. Available from: <http://innovareacademics.in/journals/index.php/ajpcr/article/download/15477/9539>
79. Aamir M, Khan JA, Shakeel F, Asim SM. Unlicensed and off-label use of drugs in pediatric surgical units at tertiary care hospitals of Pakistan. *Int J Clin Pharm.* 2017 Jun 9;
