# Supplementary figures and images for: A systematic review of substandard, falsified, unlicensed and unregistered medicine sampling studies: a focus on context, prevalence, and quality
Source: PubMed Central journal article supplement — BMJ Glob Health. 2020 Aug 27;5(8):e002393. doi: 10.1136/bmjgh-2020-002393 (PMC7454198; doi:10.1136/bmjgh-2020-002393), 2020-08-27

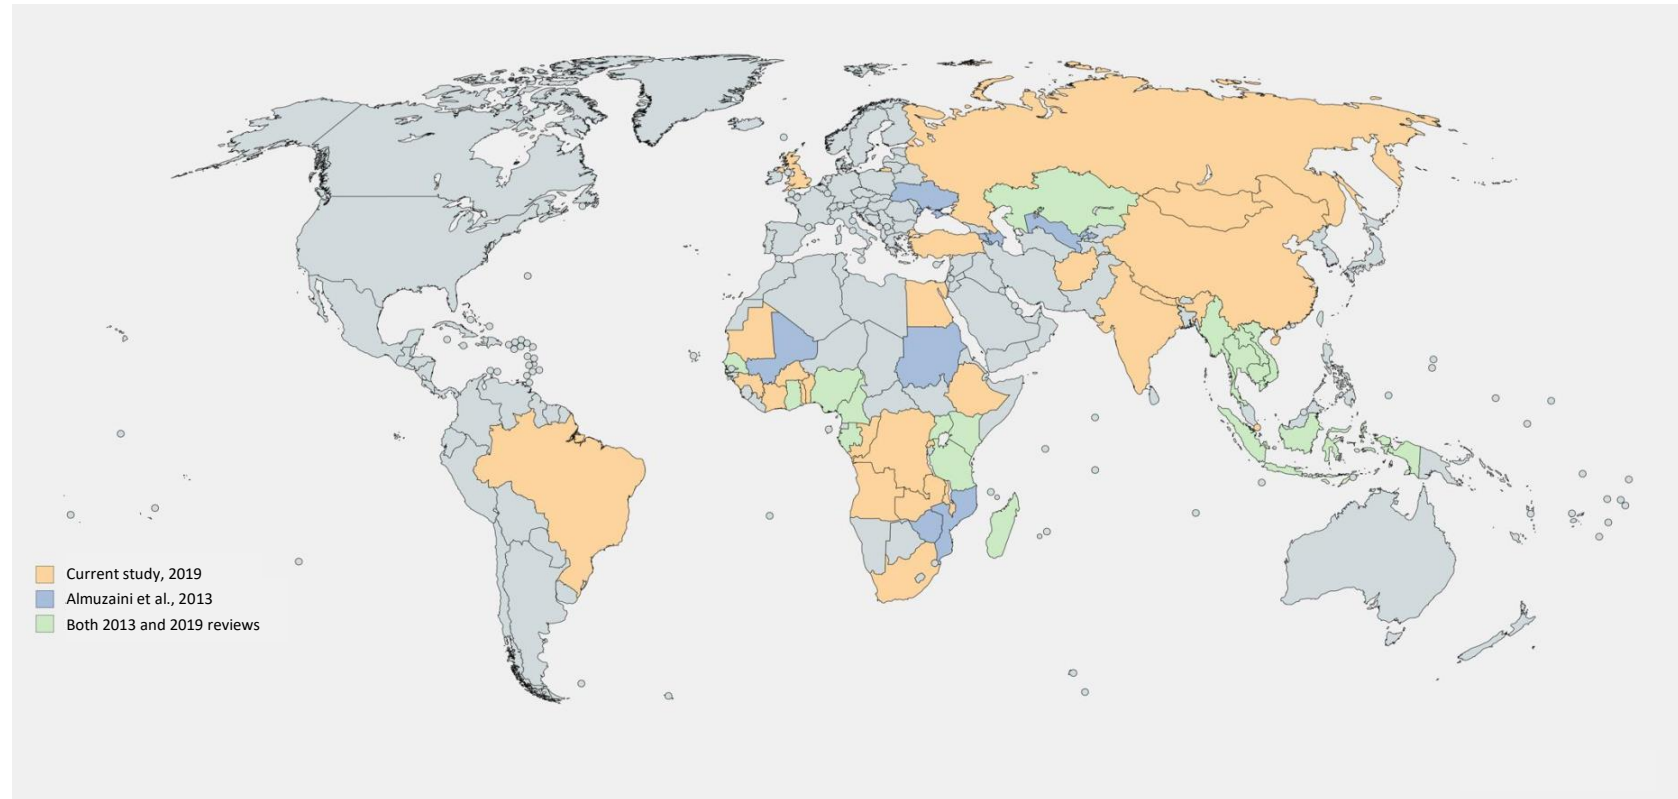

Supplement: bmjgh-2020-002393supp002.pdf [file bmjgh-2020-002393supp002.pdf]

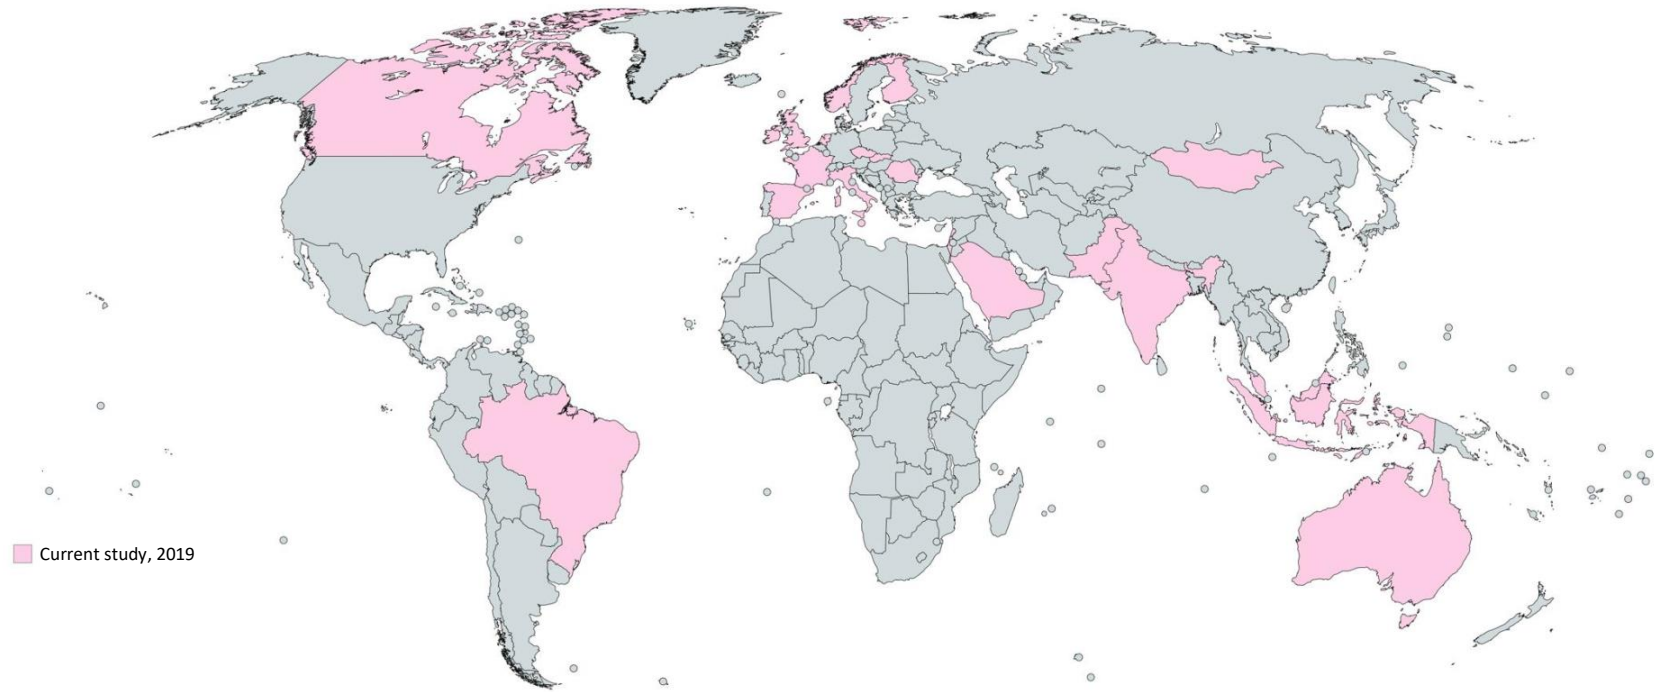

Supplement: bmjgh-2020-002393supp003.pdf [file bmjgh-2020-002393supp003.pdf]
